# Supplementary material for: Comparative analysis of culture- and ddPCR-based wastewater surveillance for carbapenem-resistant bacteria
Source: Royal Society of Chemistry journal article supplement (doi:10.1039/d4ew00525b), 2024-08-16
Supplement: d4ew00525b1.pdf [file d4ew00525b1.pdf]

Supplementary information for

**Comparative analysis of culture- and ddPCR-based wastewater surveillance  
for carbapenem-resistant bacteria**

Siyi Zhou<sup>1</sup>, Esther G. Lou<sup>1</sup>, Julia Schedler<sup>2</sup>, Katherine B. Ensor<sup>2</sup>, Loren Hopkins<sup>2,3</sup> and Lauren  
B. Stadler<sup>1,\*</sup>

<sup>1</sup> Department of Civil and Environmental Engineering, Rice University, 6100 Main Street, MS  
519, Houston, TX 77005

<sup>2</sup> Department of Statistics, Rice University, 6100 Main Street MS 138, Houston, TX 77005

<sup>3</sup> Houston Health Department, 8000 N. Stadium Dr., Houston, TX 77054

\*Corresponding author: Lauren B. Stadler ([lauren.stadler@rice.edu](mailto:lauren.stadler@rice.edu))

## 1. Materials and Methods

The protocols for wastewater sample processing, concentration, DNA extraction, and ddPCR quantification of gene targets are described as below. EMMI checklist is provided in Table S10 (1).

**Influent solids concentration:** We aliquoted influent wastewater samples into two 50 mL conical centrifuge tubes. We thoroughly homogenized wastewater samples by shaking sample bottles prior to and in between aliquoting each replicate. 50 mL wastewater samples were centrifuged for 20 minutes at 4,100 RPM and 4 °C. After centrifugation, we carefully poured off the supernatant and saved the solid portion of sample leftover in the centrifuge tubes and added 1 mL lysis buffer to each centrifuge tube and mixed well with pipette in order to suspend the solids pellet. Once suspended, all content from the centrifuge tube was transferred into a 2 mL bead beating tube.

**Extraction:** DNA extraction was performed using a Chemagic™ Prime Viral DNA/RNA 300 Kit H96 (Chemagic, CMG-1433, PerkinElmer). We followed the manufacturer's recommended protocol for the sample preparation. The tubes were bead beaten at max speed in a Mini-Beadbeater 24 (3,500 RPM; 112011, BioSpec) for 1 minute, set on ice for 2 minutes, and bead beaten again at max speed for 1 minute. After bead beating, the tubes were centrifuged to pellet the beads (17,000 g, 4 °C). Subsequently, 300 µL of supernatant from each bead tube was loaded into a 96-deep well plate followed by addition of 300 µL lysis buffer and 14 µL of Proteinase K as directed by the manufacturer's protocol. Apart from the sample plate, an elution buffer plate, a magnetic bead plate, a wash buffer plate, and an eluate collection plate were prepared as directed

by the protocol. All plates were loaded onto the Chemagic. The extraction program “Chemagic Viral300 360 H96 drying prefilling VD200309.che” was selected for automated nucleic acid extraction. Each sample was eluted to generate a 50 µL nucleic acid extract. After nucleic acid extraction, all sample extracts were sealed and stored at - 20 °C until further analysis.

**Quantification:** ddPCR was performed on a QX600 AutoDG Droplet Digital PCR System (Bio-Rad) and a C1000 Thermal Cycler (Bio-Rad) in 96-well optical plates. Five carbapenemase-encoding gene (*bla*<sub>IMP</sub>, *bla*<sub>NDM</sub>, *bla*<sub>VIM</sub>, *bla*<sub>OXA-48-like</sub> and *bla*<sub>KPC</sub>) targets were quantified in wastewater samples using a multiplex ddPCR assay. Briefly, a 22 µl reaction mix containing 10 µl of nucleic acid was mixed with the ddPCR Multiplex Supermix (Bio-Rad) following the manufacturer’s protocol. We used tenfold dilutions for all samples in the ddPCR reactions to minimize inhibition effects and ensure accurate DNA quantification. Reaction mix compositions and thermal cycling conditions are detailed in Tables (S2-S5). Droplets were read on a QX600 Droplet Reader (Bio-Rad) and analyzed using QuantaSoft v1.7.4 software. Droplets were manually thresholded per channel and data were exported to an Excel file for further analysis. Positive controls (gene fragments) were spiked into DI water in triplicate on each plate. If the observed copy numbers did not align with the expected spiked values or if the droplet amplitudes were not clearly separated, the entire plate was re-run.

For the qPCR assay, we utilized primers and standards from a previous study to quantify the *rpoB* gene, adhering to the same thermocycling conditions as described previously (2). To determine the C<sub>q</sub> values and real copy numbers for our samples, we first prepared a standard curve using a series of tenfold dilutions of the target gene *rpoB*. The log of the copy number per microliter and the corresponding C<sub>q</sub> values for these standards were plotted, resulting in a

standard curve equation  $y = - 3.9692x + 41.935$  ( $R^2 = 0.999$ ), where  $y$  represents the Cq value and  $x$  represents the log copy number. For each sample, the Cq value was measured using the Thermal Cycler QuantStudio 3. These values were then used in the standard curve equation to calculate the log copy number per microliter. Technical replicates were consistently performed, and calculations were standardized. We confirmed the assay's sensitivity by ensuring the lowest standard measured met the 95% limit of detection.

**LOD:** A limit of detection (LOD)  $\geq 3$  positive droplets and an acceptable total generated droplet count of at least 10,000 were established for all sample wells as recommended by the manufacturer, and based on methods previously described by Lou et al., 2022 (3). In addition to the 3 droplets threshold, the initial LOD concentration for the plate was calculated by averaging the concentrations of all negative control samples on a given plate. A copy number of 0.7 gene copies/ $\mu\text{L}$  was assigned to any plate when none of the negative controls contained any positive droplets. This corresponds to the concentration of 3 positive droplets among 10,000 total generated droplets.

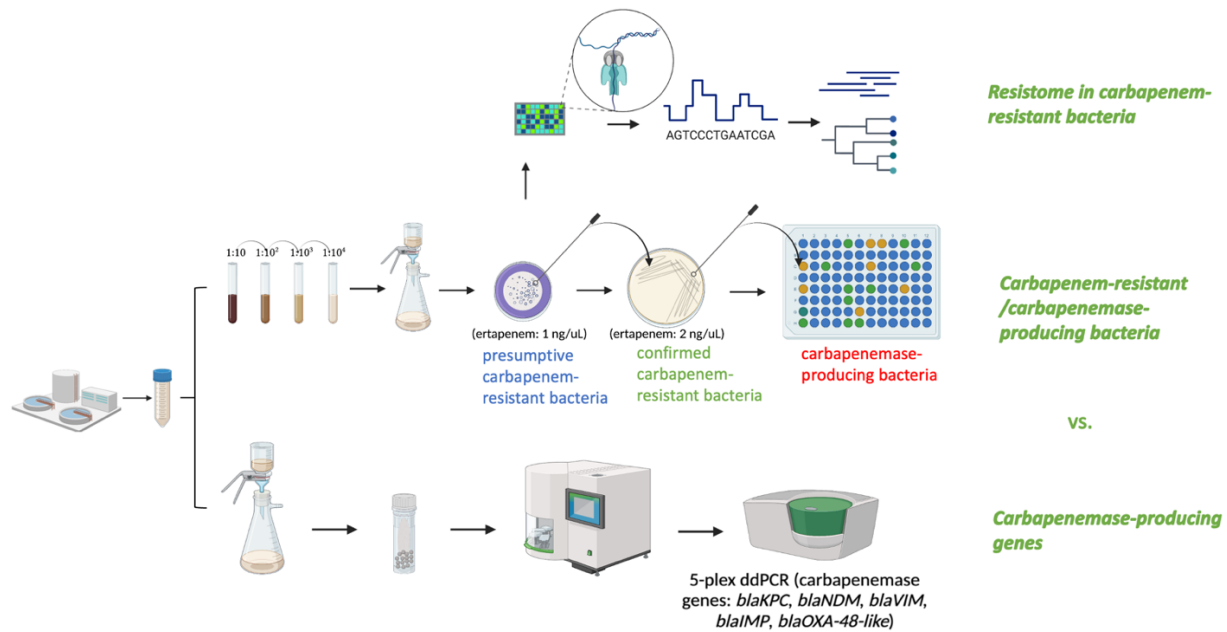

**Figure S1.** Comparison of culture-based and molecular methods for detecting carbapenem-resistant bacteria and carbapenemase-producing genes in wastewater. The culture-based method involves serial dilution, filtration, and incubation on selective media with ertapenem (1 ng/ $\mu$ L and 2 ng/ $\mu$ L) to identify presumptive and confirmed carbapenem-resistant bacteria, respectively, followed by further testing for carbapenemase production. The molecular method includes DNA extraction from filtered wastewater samples, a 5-plex ddPCR assay targeting five carbapenemase-encoding genes, and nanopore long-read sequencing to analyze the resistome, providing insights into resistance genes and mechanisms.

**Table S1.** Wastewater treatment plants sampled, service populations, and geographic service areas.

| Wastewater treatment plant | Abbreviation | Population | Average gal/cap/day | Area, square miles |
|----------------------------|--------------|------------|---------------------|--------------------|
| 69th Street                | 69           | 551,150    | 145                 | 96.72              |
| Upper Brays                | UB           | 97,918     | 105                 | 12.81              |
| West District              | WD           | 85,129     | 118                 | 17.86              |

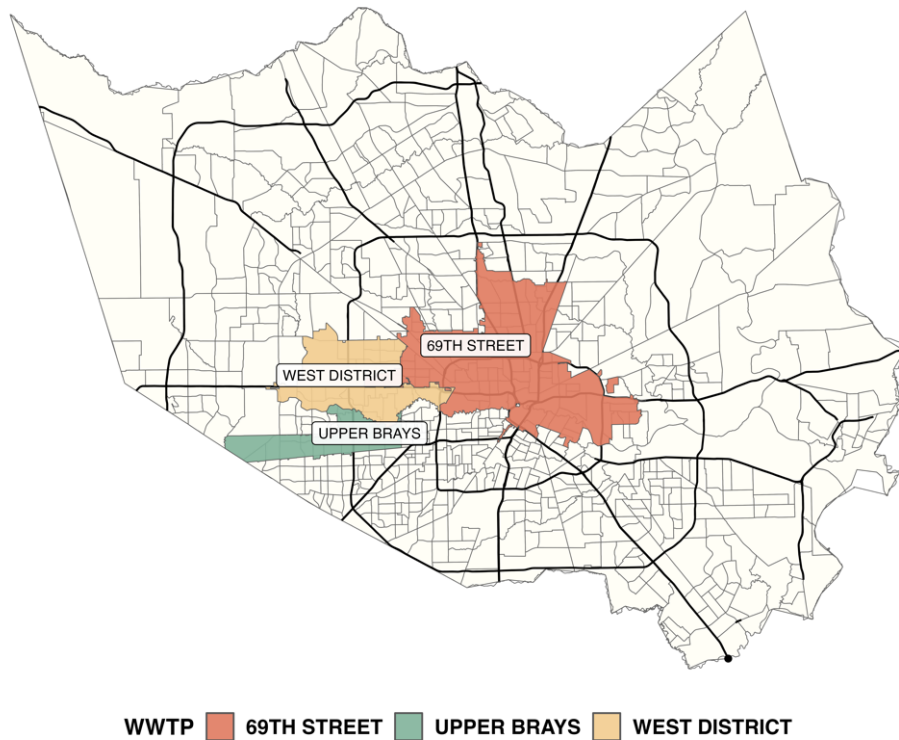

**Figure S2. Service areas of the three wastewater treatment plants (69, UB, WD).**

**Table S2. Concentration factors for sample processing procedure.**

| <b>Concentration and extraction procedures</b>                            | <b>Vol.</b> | <b>Unit</b> | <b>Concentration Factor</b> |
|---------------------------------------------------------------------------|-------------|-------------|-----------------------------|
| Raw wastewater samples for centrifugation                                 | 50          | ml          | -                           |
| Sample with lysis buffer for bead-beating                                 | 1000        | $\mu$ l     | 50                          |
| Lysate transferred after bead-beating                                     | 300         | $\mu$ l     |                             |
| Mastermix added [lysis buffer, Poly(A) RNA and proteinase K] for Chemagic | 314         | $\mu$ l     |                             |
| DNA Elution volume                                                        | 50          | $\mu$ l     | 6                           |
| Overall concentration factor                                              |             |             | 300                         |

**Table S4. Primer and probe sequences used for ddPCR quantification**

| Targets                           | Primer /probe | Sequence (5'-3')                                             | Amplicon size (bp) |
|-----------------------------------|---------------|--------------------------------------------------------------|--------------------|
| <i>bla</i> <sub>OXA-48-like</sub> | Oxa-f         | TTACCCGCATCTACCTTT                                           | 186                |
|                                   | Oxa-r         | GCGGGCAAATTCTTGATA                                           |                    |
|                                   | Oxa-p         | /5Cy55/TG GTT AAG GAT GAA CAC CAA<br>GTC TT/3IAbRQSp/        |                    |
| <i>bla</i> <sub>VIM</sub>         | Vim-f         | YAATGGWCTCATTGTCCGTG                                         | 80                 |
|                                   | Vim-r         | GAAGTGCCGCTGTGTTTTTC                                         |                    |
|                                   | Vim-p         | /5Cy5/CT TYT KAT T/TAO/G ATA CAG CGT<br>GGG GTG C/3IAbRQSp/  |                    |
| <i>bla</i> <sub>KPC</sub>         | Kpc-f         | CGGAACCATTTCGCTAAACTC                                        | 135                |
|                                   | Kpc-r         | GAAAGCCCTTGAATGAGCTG                                         |                    |
|                                   | Kpc-p         | /56-ROXN/AC TTT GGC GGC TCC ATC GGT<br>GTG TA/3IAbRQSp/      |                    |
| <i>bla</i> <sub>IMP</sub>         | Imp-f         | AGTYAMTTGGTTTGTGGAGC                                         | 93                 |
|                                   | Imp-r         | TTAAGCCACTCTATTCCNCC                                         |                    |
|                                   | Imp-p         | /56-FAM/CC TCW CAT T/ZEN/T YCA TAG<br>CGA CAG CAC G/3IABkFQ/ |                    |
| <i>bla</i> <sub>NDM</sub>         | Ndm-f         | GATTGCGACTTATGCCAATG                                         | 189                |
|                                   | Ndm-r         | TCGATCCCAACGGTGATATT                                         |                    |
|                                   | Ndm-p         | /5SUN/AC ACA GCC T/ZEN/G ACT TTC<br>GCC G/3IABkFQ/           |                    |

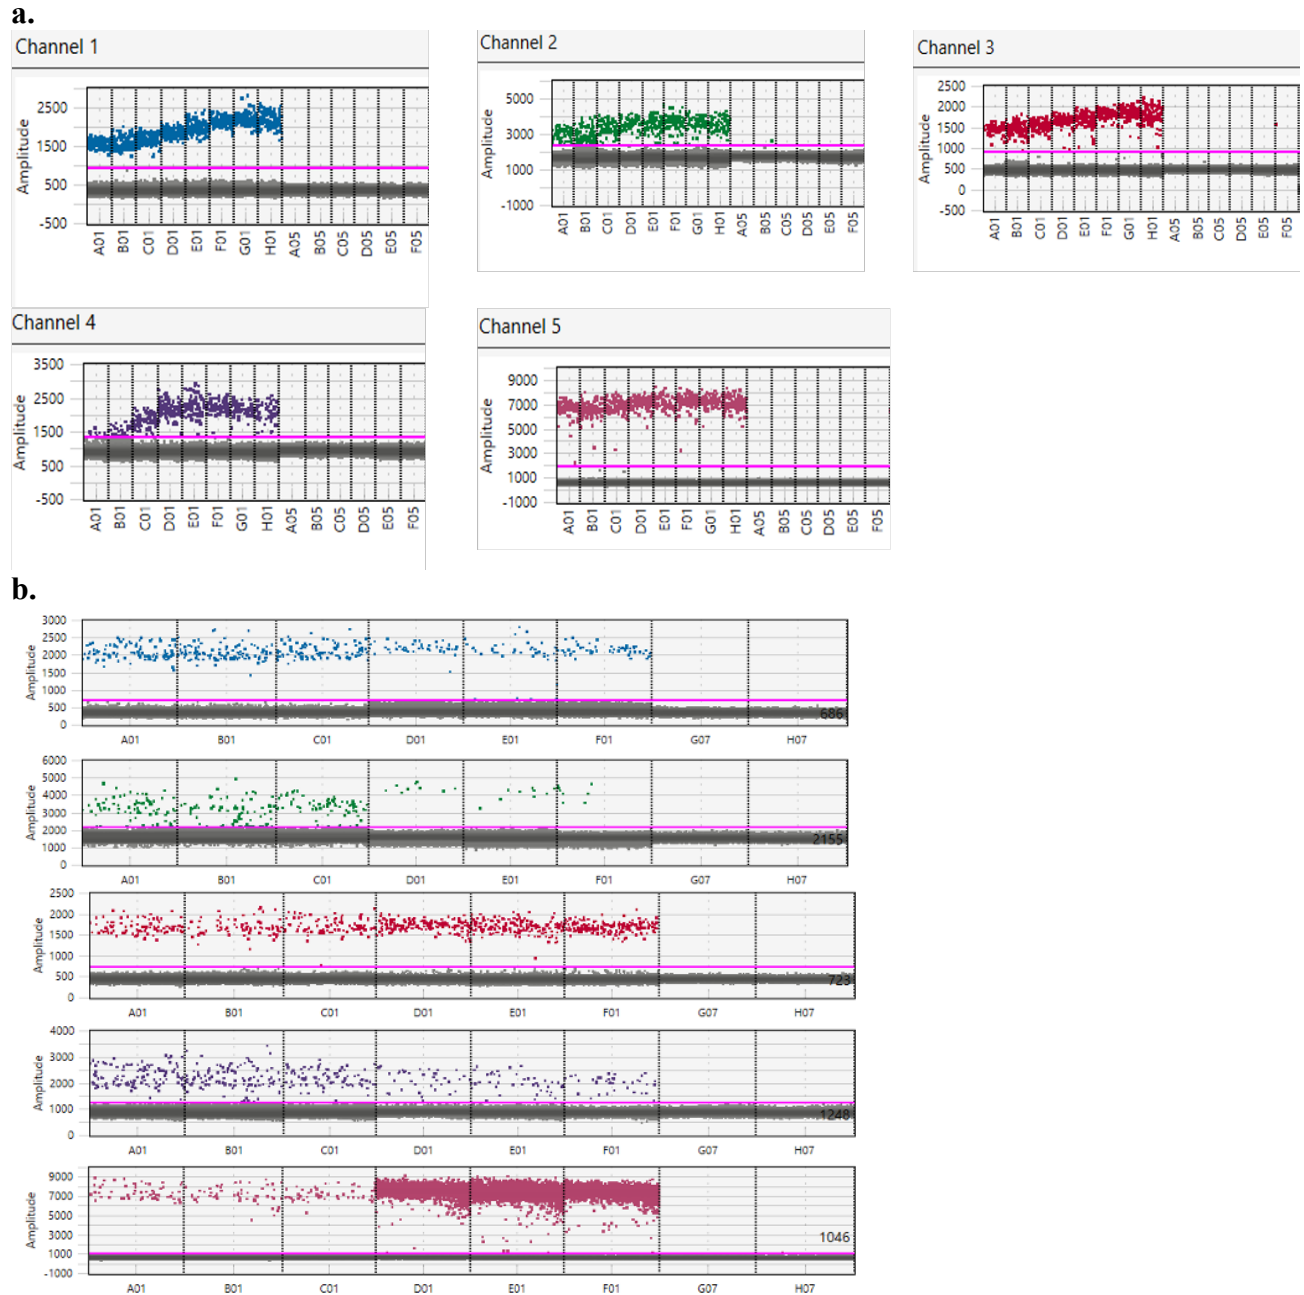

**Figure S3.** Multiplexed ddPCR assay optimization and application. (a) Annealing temperature optimization across a gradient from 56.2 °C to 62 °C (wells A to H) to determine optimal conditions. Gblocks were distributed across wells A01 to H01, with no-template controls (NTCs) positioned in wells A05 to F05. (b) Implementation of the multiplexed ddPCR assay using gblocks (wells A01 to C01), wastewater samples (wells D01 to F01), and additional NTCs (wells G07 to H07) to assess the presence of five genes. The targets, visualized in channels 1 to 5, include *bla<sub>IMP</sub>* (FAM, depicted as blue dots), *bla<sub>NDM</sub>* (SUN, green dots), *bla<sub>VIM</sub>* (Cy5, red dots), *bla<sub>OXA-48-like</sub>* (Cy5.5, purple dots), and *bla<sub>KPC</sub>* (ROX, pink dots).



**Table S5. Reaction composition for multiplex ddPCR assay.**

| Component                                        | Final concentration |
|--------------------------------------------------|---------------------|
| Multiplex Supermix                               | 1x                  |
| Primer/Probe - <i>bla</i> <sub>IMP</sub>         | 900 nM/ 250 nM      |
| Primer/Probe - <i>bla</i> <sub>NDM</sub>         | 900 nM/ 250 nM      |
| Primer/Probe - <i>bla</i> <sub>VIM</sub>         | 900 nM/ 250 nM      |
| Primer/Probe - <i>bla</i> <sub>OXA-48-like</sub> | 900 nM/ 250 nM      |
| Primer/Probe - <i>bla</i> <sub>KPC</sub>         | 900 nM/ 250 nM      |
| RNase/DNase free water                           | variable            |
| DNA template                                     | variable            |

**Table S6. Thermal cycling conditions for multiplex ddPCR assay.**

| Cycling Step          | Temperature °C | Time   | Number of Cycles |
|-----------------------|----------------|--------|------------------|
| Enzyme activation     | 95             | 10 min | 1                |
| Denaturation          | 95             | 1min   | 40               |
| Annealing/Extension   | 57.9           | 1min*  |                  |
| Enzyme Deactivation   | 72             | 2 min  |                  |
| Droplet Stabilization | 4              | 30 min | 1                |
| Hold                  | 4              | ∞      |                  |

\*Ramp rate is set to 2 °C / sec.

**Table S7. Gene fragment standards (gblocks) as positive controls and sanger sequencing results.**

| gene                      | gblock                                                                                                                                                                                                                                                                                                                                      | sanger sequencing results*                                                                                                               |
|---------------------------|---------------------------------------------------------------------------------------------------------------------------------------------------------------------------------------------------------------------------------------------------------------------------------------------------------------------------------------------|------------------------------------------------------------------------------------------------------------------------------------------|
| <i>bla</i> <sub>KPC</sub> | CGGAACCATTCGCTAAACTCGAACAGGACTTTGGCGGCTCC<br>ATCGGTGTGTACGCGATGGATACCGGCTCAGGCGCAACTGT<br>AAGTTACCGCGCTGAGGAGCGCTTCCACTGTGCAGCTCAT<br>TCAAGGGCTTTC                                                                                                                                                                                          | NNNNNNNGGCTNNTCGGTGTGTACGCGATGGA<br>TACCGGCTCAGGCGCAACTGTAAGTTACCGCGC<br>TGAGGAGCGCTTCCACTGTGCAGCTCAITCAA<br>GGGCTTTC                    |
| <i>bla</i> <sub>IMP</sub> | TTCCTAAACATGGTTTGGTGGTTCTTGTAAATGCTGAGGCTT<br>ACCTAATTGACACTCCATTTACGGCTAAAGATACTGAAAAG<br>TTAGTCACTTGGTTTGTGGAGCGTGGCTATAAAAATAAAAGG<br>CAGCATTTCCTCTCATTTTCATAGCGACAGCACGGGCGGAAT<br>AGAGTGGCTTAATTCTCGATCTATCCCCACGTATGCATCTGA<br>ATTAACAAATGAACCTGCTTAAAAAAGACGGTAAGGTTCAAG<br>CCACAAATTCATTTAGCGGAGTTAACTATTGGCTAGTTAAA<br>AATAAAATTGA | NNNNCTATAAAAATAAAAGGCAGCATTTCTCTC<br>ATTTTCATNGCGACAGCACGGGCGGAATAGNNT<br>GGCTTAN                                                        |
| <i>bla</i> <sub>VIM</sub> | GTTTGGTCGCATATCGCAACGCAGTCGTTTGTATGGCGCGGTC<br>TACCCGTCCAATGGTCTCATTTGTCCTGATGGTGATGAGTTG<br>CTTTTGATTGATACAGCGTGGGGTGCAAAAACACAGCGGC<br>ACTTCTCGCGGAGATTGAAAAGCAAAGATTGCGACTTATGC                                                                                                                                                          | NNNTGGTCTCATTGTCCGNTGATGGTGANGAGT<br>GNTTTTGGATTGATACAGCGTGGNNNN<br>NNNNNCGAACCAGCTTGCCCCGCAAGAGGGGA<br>TGGTTGCGGCGCAACACAGCCTGACTTTCGCC |
| <i>bla</i> <sub>NDM</sub> | CAATGCGTTGTGCAACCAGCTTGCCCCGCAAGAGGGGATGG<br>TTGCGGCGCAACACAGCCTGACTTTCGCCGCAATGGCTGG<br>GTCGAACCAGCAACCAGCGCCCAACTTTGGCCCCGCTCAAGGT                                                                                                                                                                                                        | NCCAATGGCTGGGTGCAACCAGCAACCAGCGCC<br>CAACTTTNNCCCGCTCAAGGTATTTTACCCCGG                                                                   |

```

ATTTTACCCCGGCCCGGCCACACCAGTGACAATATCACCG CCCNGGCCACACCAGTGACAATATCACCGTTGG
TTGGGATCGACGGCACCG GATCGAN
ATTTTACCCGCATCTACCTTTAAAATTCCCAATAGCTTGAT NNNNNNNNNNNNNAACACNNAGTCTTTAAGTG
CGCCCTCGATTGGGCGTGGTTAAGGATGAACACCAAGTCT GGATGGACAGACGCGNGATATCGCCANCTTGG
TTAAGTGGGATGGACAGACGCGCATATCGCCACTTGGAAAT AATCGNGATCATNNTNCTAATCACC GCGATGAA
CGCGATCATAATCTAATCACC GCGATGAAATATTCGGTTGT NNANCTCA GTTGTGCCTGTTTATCAAGAATTG
GCCTGTTTATCAAGAATTTGCCGCAAATTGGCGAGGCAC CCCGCCAAAA
GTATGAGCAAGATGCTACATGCTTTCGATTATGGTAATGAG
GACATTTCCGGCAATGTAGATACTTTTGGCTTGATGGTGGT
ATTCGAATTC

```

\*Highlighted bases indicate mismatches. 'N' indicates ambiguous bases that could not be confidently identified.

## 2. Results and Discussion

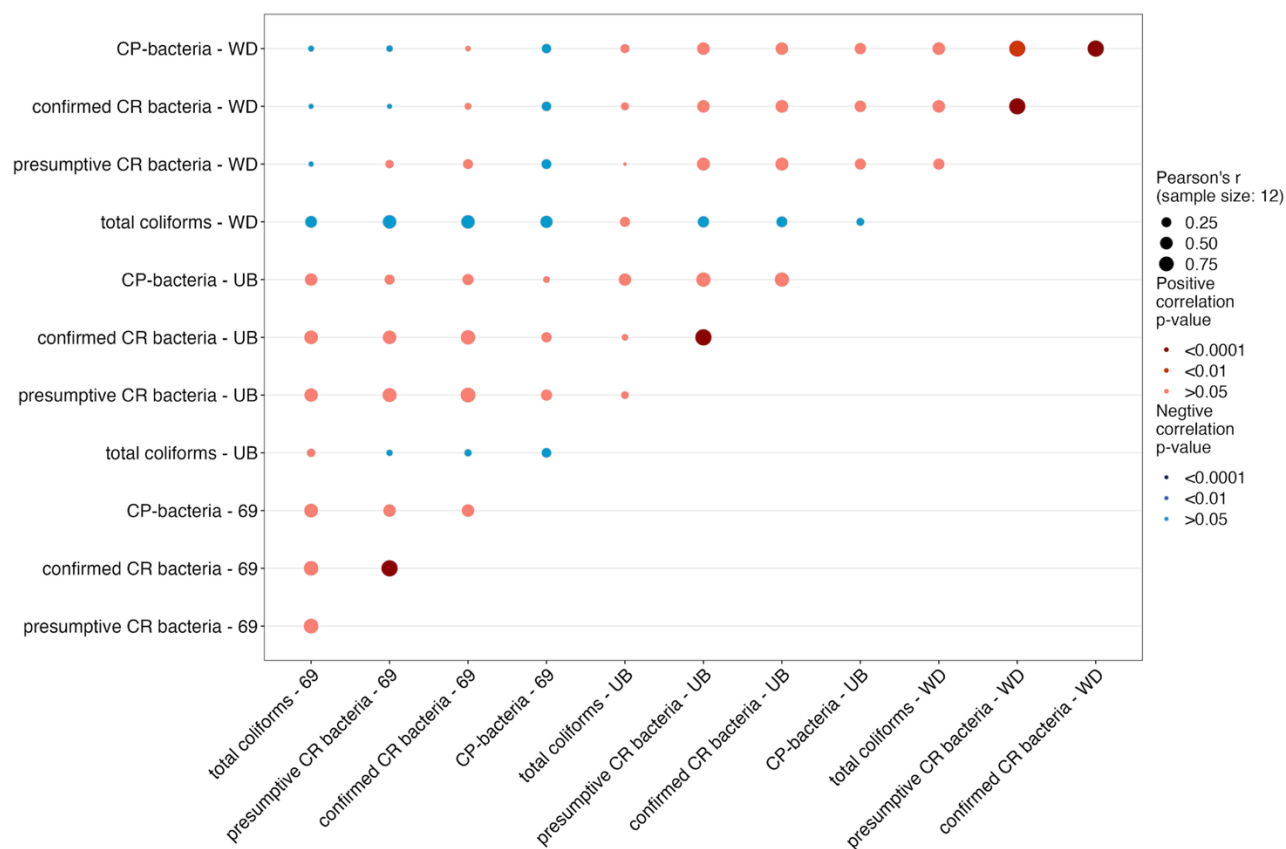

**Figure S4.** Pearson correlation of concentrations of total coliforms, presumptive CR bacteria, confirmed CR bacteria, and carbapenemase-producing bacteria within and across WWTPs. Bubble size reflects the Pearson correlation coefficient, with larger bubbles representing stronger correlations. The color of the bubble indicates the p-value's significance level: blue signifies a negative correlation, red signifies a positive correlation, and darker shades indicate stronger p-values.

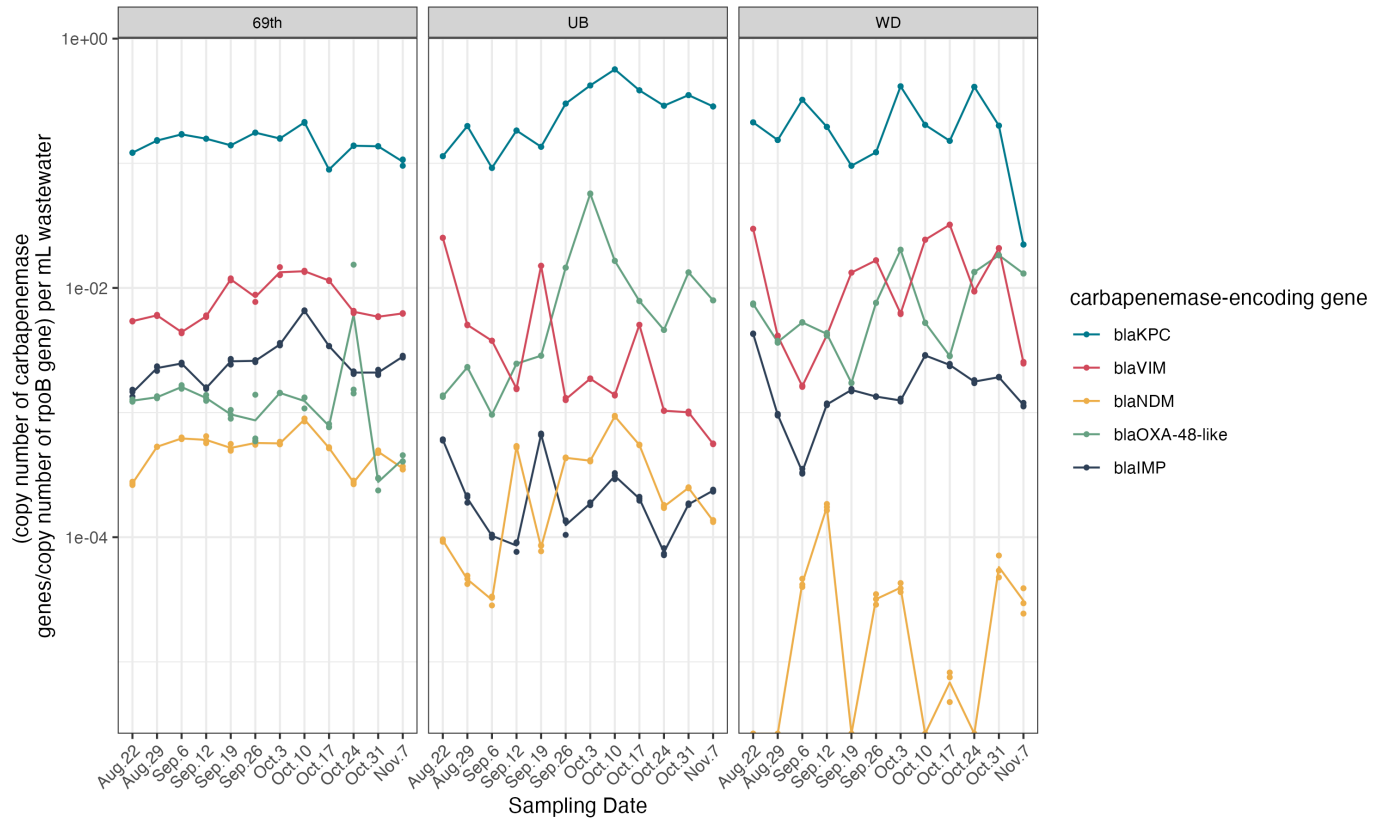

**Figure S5.** Relative abundance of carbapenemase-encoding genes (copy number of ARG/copy number of *rpoB* genes per mL) in influent over 12 weeks from three WWTPs. Each panel represents a different WWTP. Each dot represents a replicate measurement, and the lines connect the mean values of the replicates.

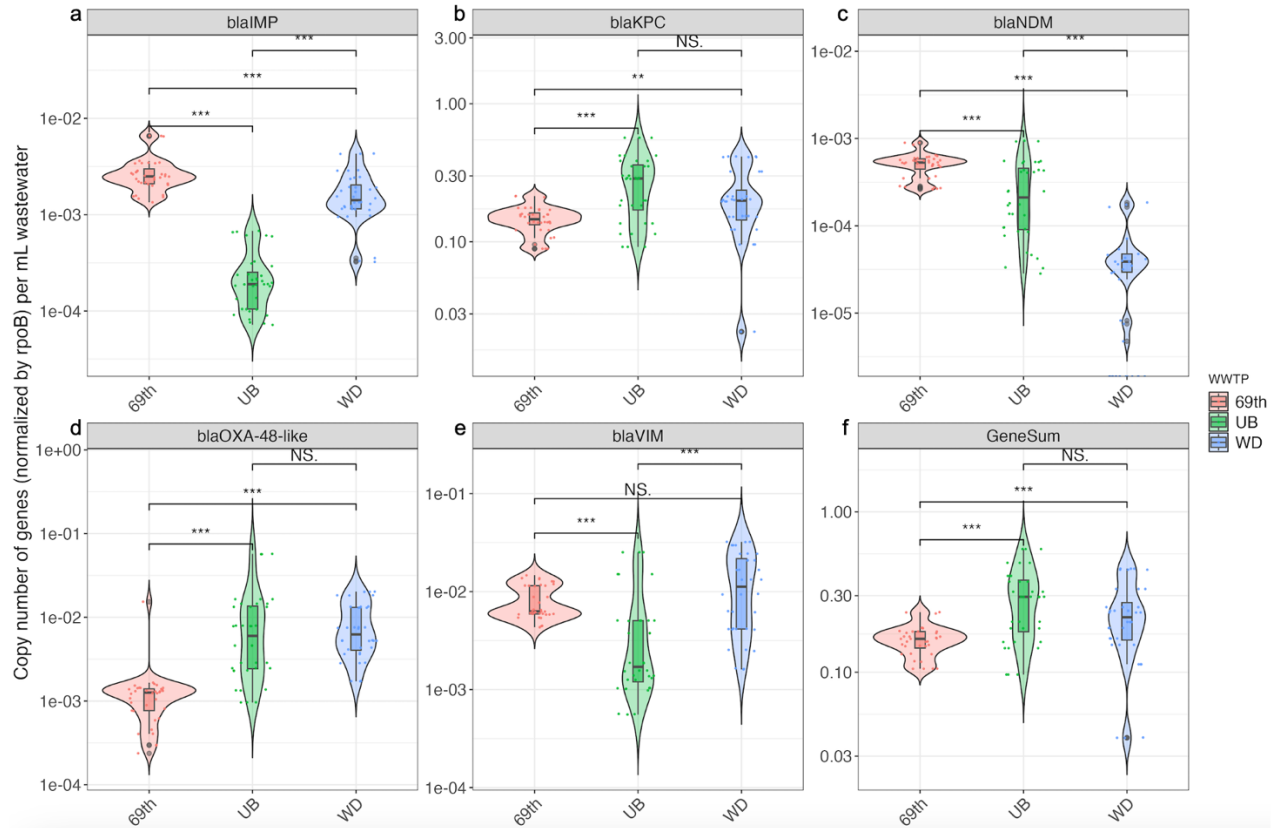

**Figure S6.** Comparison of carbapenemase gene relative abundances (normalized by *rpoB* gene) across WWTPs (panels a – e) and cumulative concentration of the five genes (panel f). Wilcoxon rank-sum test was used to determine statistical significance. Violin plots depict the distribution of gene copy numbers within each WWTP, with dots symbolizing individual data points. Inner boxes delineate the dataset's quartiles, with solid lines marking the medians. The whiskers show the minimum and maximum values. The asterisks represent the significance levels, '\*' for  $p < 0.05$ , '\*\*' for  $p < 0.01$ , '\*\*\*' for  $p < 0.001$ , and 'NS' means not significant or  $p > 0.05$ .

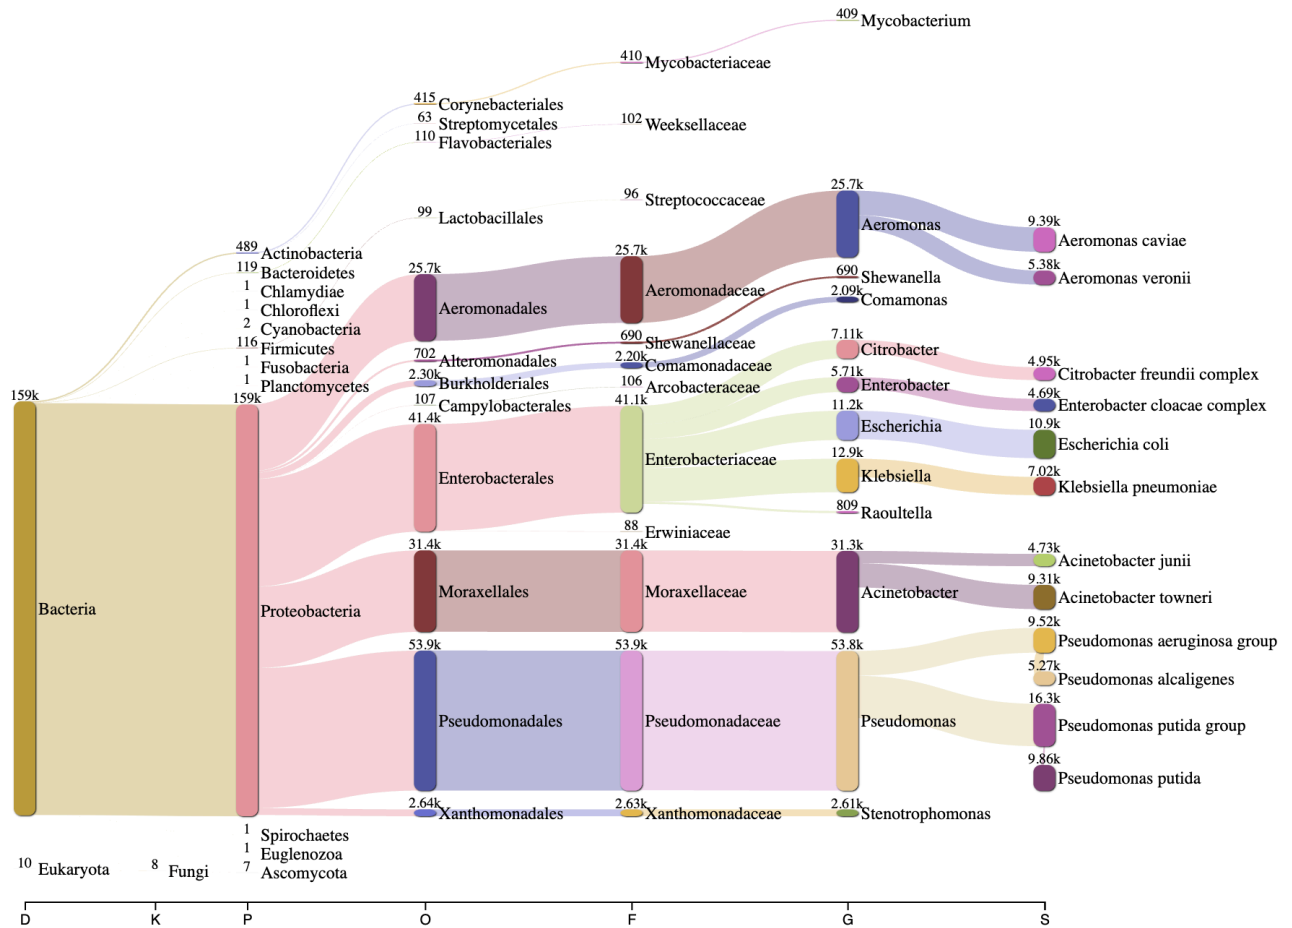

**Figure S7.** Distributions of presumptive carbapenem-resistant bacteria from influent samples collected from three WWTPs. The phylogenetic tree displays the diversity and relative abundance of presumptive carbapenem-resistant bacteria isolated using culture-based methods. The numbers displayed indicate the read counts. All chromosomal reads over 1,000 bp underwent taxonomic classification.

## References

1. Borchardt MA, Boehm AB, Salit M, Spencer SK, Wigginton KR, Noble RT. The Environmental Microbiology Minimum Information (EMMI) Guidelines: qPCR and dPCR Quality and Reporting for Environmental Microbiology. *Environ Sci Technol*. 2021 Aug 3;55(15):10210–23.
2. Silkie SS, Nelson KL. Concentrations of host-specific and generic fecal markers measured by quantitative PCR in raw sewage and fresh animal feces. *Water Res*. 2009 Nov;43(19):4860–71.
3. Lou EG, Sapoval N, McCall C, Bauhs L, Carlson-Stadler R, Kalvapalle P, et al. Direct comparison of RT-ddPCR and targeted amplicon sequencing for SARS-CoV-2 mutation monitoring in wastewater. *Sci Total Environ*. 2022 Aug 10;833:155059.
